# Supplementary material
Source: PubMed Central journal article supplement (PMC3222294)

## Supplementary Information

### Structural insights into RNA recognition by RIG-I

Dahai Luo, Steve C. Ding, Adriana Vela, Andrew Kohlway, Brett Lindenbach, Anna Marie Pyle

### Legends for Supplementary Figures and Tables

**Figure S1**, related to Figure 1

**2Fo-Fc map at the three-ways interface between HEL1, CTD, and dsRNA.**

**Figure S2**, related to Figure 3

**Sequence alignment of the RIG-I and related helicases** Sequence alignment of the closely related SF2 helicases, including RIG-I orthologs, MDA-5 and LGP-2 from *Homo sapiens*, Dicer-related-Helicase 3 (DRH-3) from *Caenorhabditis elegans*, Hef helicase from *Pyrococcus furiosus*, Rad54 from *Sulfolobus solfataricus*, Dicer from *Homo sapiens*, and eIF4A3 from *Homo sapiens*

**Figure S3**, related to Figure 1

**SAXS analysis of RNA binding induced conformational changes of RIG-I ( $\Delta$ CARDs).** (A) Experimental SAXS data for the RIG-I ( $\Delta$ CARDs) and RIG-I ( $\Delta$ CARDs):dsRNA10 complex are shown as red and blue lines with error bars. The theoretical scattering curve for the RIG-I ( $\Delta$ CARDs):dsRNA10 crystal structure is in black. Momentum transfer,  $s$ , is defined as  $4\pi \sin(\theta)/\lambda$ , where  $2\theta$  is the angle between the incident and scattered radiation and  $\lambda$  is the wavelength of the X-ray beam. Correlation between the scattering curve for RIG-I ( $\Delta$ CARDs):dsRNA10 (blue) and the theoretical curve (black) results in a  $\chi^2$  value of 4.80. That  $\chi^2$  is not closer to 1.0 is likely due to compaction from crystallization conditions, and because the construct contains additional N-terminal tail residues and residues from HEL2 that were not visualized or modeled in the structure. By contrast, correlation between the scattering curve for free RIG-I ( $\Delta$ CARDs) protein and the theoretical curve results in a  $\chi^2$  value of 20.9, which indicates that the isolated protein adopts a different conformation from the crystal structure. (B) The distance distribution function  $P(r)$  of the RIG-I ( $\Delta$ CARDs) (red) and RIG-I ( $\Delta$ CARDs):dsRNA10 (blue), showing that the former species has two large centers of mass.

**Figure S4**, related to Figure 2 and 4

**Comparison with the closely related SF2 helicases**

(A) Superposition of the RIG-I ( $\Delta$ CARDs) and dsRNA10 complex (red ribbon) and Archaea SF2 helicase (Hef from *Pyrococcus furiosus*, blue color), based on HEL1. (B) Superposition of the HEL2i. RIG-I is in red and Hef blue. (C) Superposition of the RIG-I ( $\Delta$ CARDs) and dsRNA10 complex (red ribbon) and Eukaryotic DEAD-box helicase (eIF4A3 from *Homo sapiens*, blue color), ssRNA, ATP analog (AMPPNP-Mg<sup>2+</sup>) complex, based on HEL1. (D) Close-up view of (C), highlighting the DExx and IIa motifs.

**Figure S5**, related to Figure 5 and 6

**IFN- $\beta$  luciferase reporter assay for RIG-I signaling in Huh7.5 cells and HEK293T cells**

Different amount of pUNO-hsRIG-I plasmid was transfected into either Huh7.5 cells and HEK293T cells. Huh7.5 cells showed very low unstimulated activity and high response to polyI:C stimulation at up to 3 ng of RIG-I plasmids.

**Figure S6**, related to Figure 7

**Limited RNase digestion of RIG-I ( $\Delta$ CARDs) / polyI:C complex**

Low molecular weight polyI:C (Invivogen) was pre-incubated with RIG-I ( $\Delta$ CARDs). The complex was then subject to RNase digestion (RNase ONE (Promega) and RNase V1 (Ambion)), 4°C overnight. The reaction was boiled and denatured with 0.1% SDS. The undigested RNA fragments were then resolved with 20% denaturing PAGE. Short oligos (dsGC10, 12, 14, 18, and 22) were loaded in the same gel as markers. Around 10-15 bases are protected by RIG-I ( $\Delta$ CARDs).

**Figure S7**, related to Figure 7

**Analytical size exclusion chromatography of RIG-I ( $\Delta$ CARDs) : dsRNA oligo complexes.**

Before each SEC run, RIG-I ( $\Delta$ CARDs) was preincubated with 1.5 molar excess amount of dsRNA oligo, 1 mM AMPPNP (Adenosine 5'-( $\beta,\gamma$ -imido)triphosphate, non hydrolysable ATP analog), and 1mM MnCl<sub>2</sub>. Superdex<sup>TM</sup> 200/10300 (GEHealthcare) is used for SEC runs. All dsRNA oligos are chemically synthesized palindromic GC repeats. See Supplementary figure 4 for denaturing PAGE profile of the oligos. Significant dimerization of RIG-I ( $\Delta$ CARDs) is only observed for dsGC18 and dsGC22, see panel E and F.

**Table S1**

**Data collection and Refinement Statistics**

**Table S2**

**Primers for mutagenesis**

**Figure S1, related to Figure 1**  
**2Fo-Fc map at the three-ways interface between HEL1, CTD, and dsRNA.**

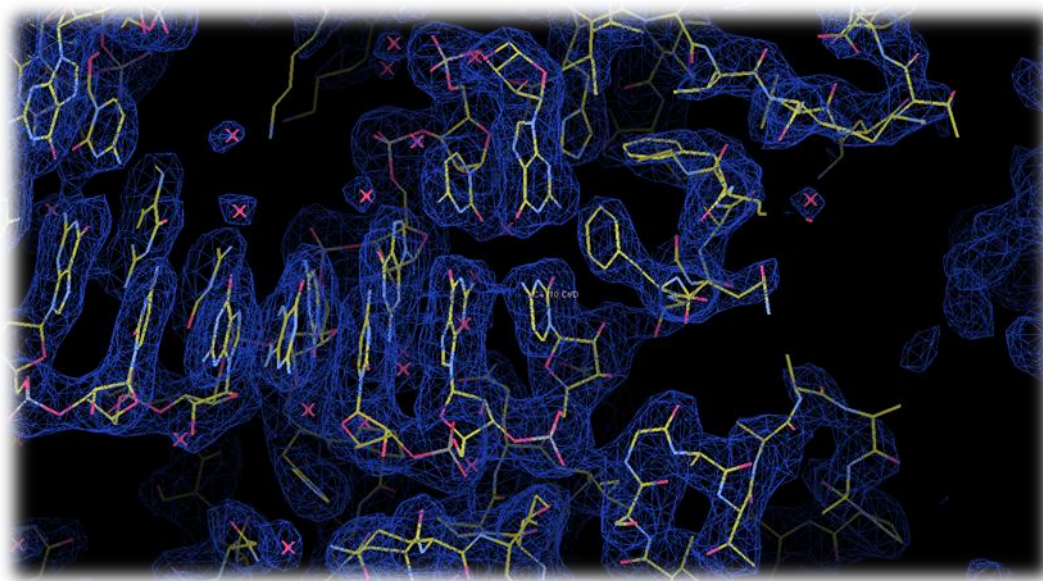





**Figure S3**, related to Figure 1  
**SAXS analysis of RNA binding induced conformational changes of RIG-I ( $\Delta$ CARDs)**

**A**

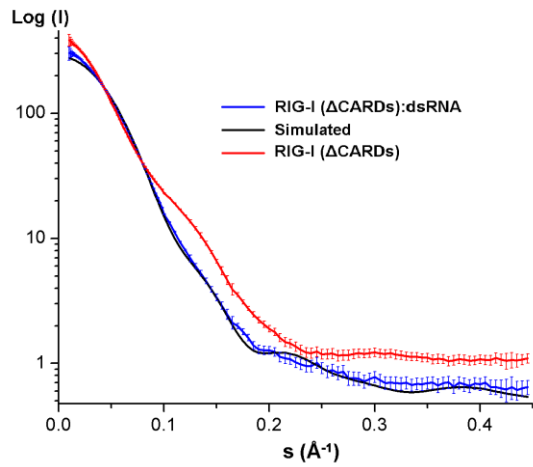

**B**

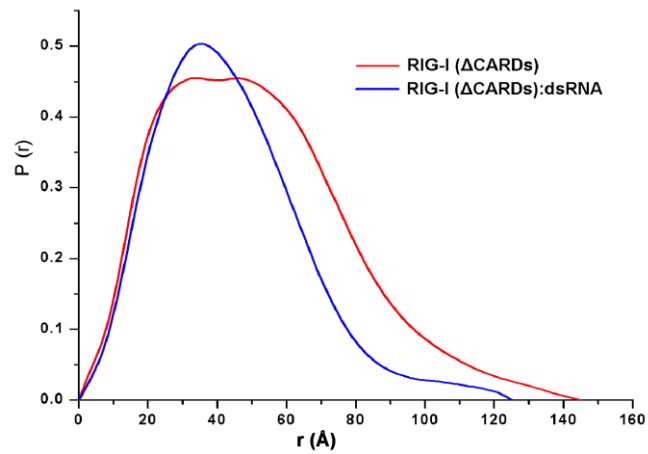

**Figure S4**, related to Figure 2 and 4  
**Comparison with the closely related SF2 helicases**

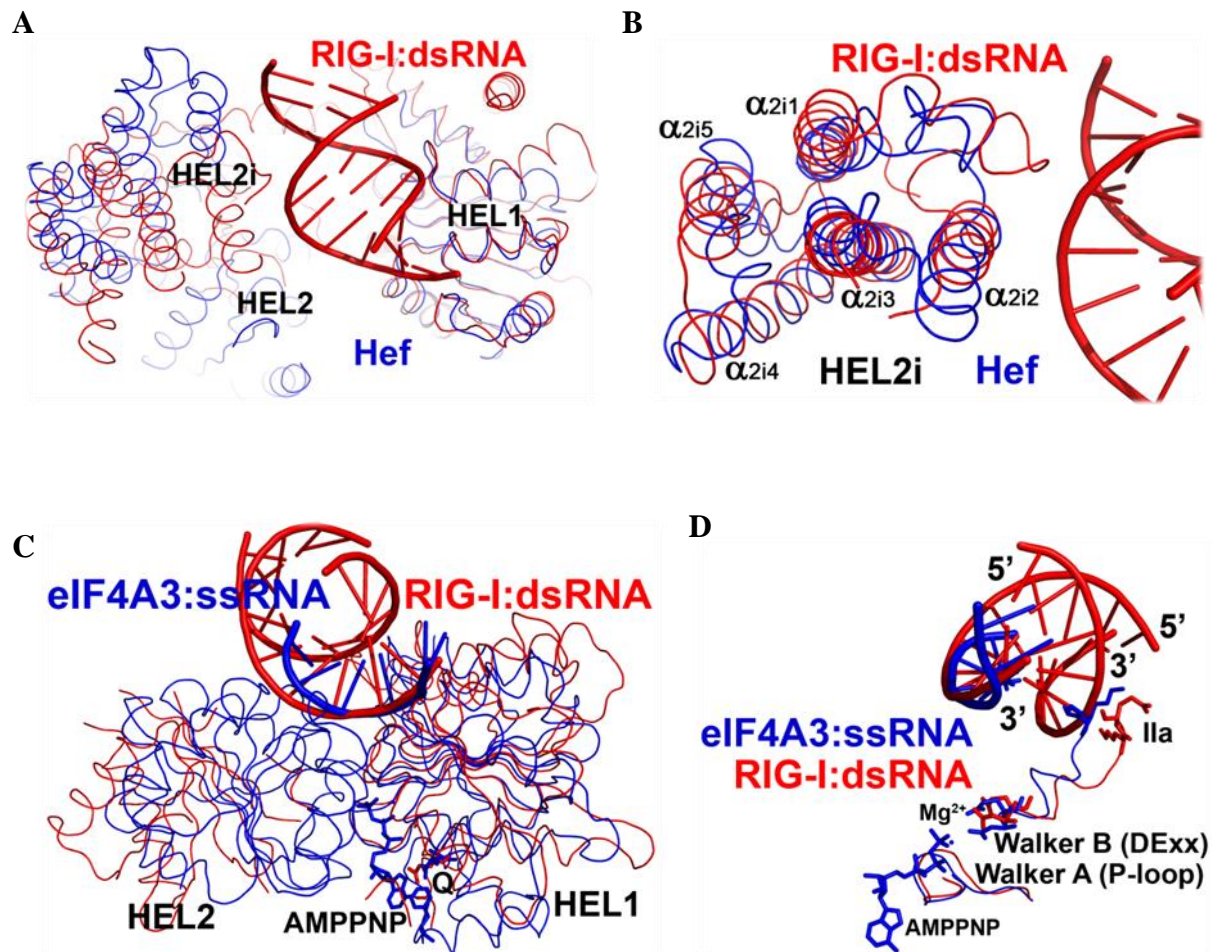

**Figure S5**, related to Figure 5 and 6  
**IFN- $\beta$  luciferase reporter assay for RIG-I signaling in Huh7.5 cells and HEK293T cells**

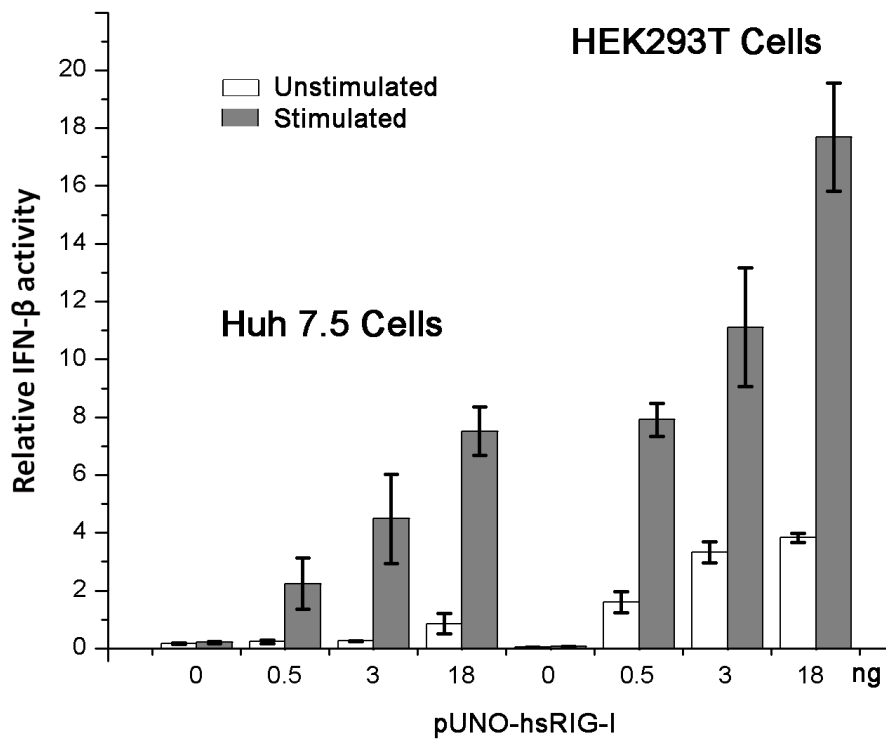

**Figure S6, related to Figure 7**  
**Limited RNase digestion of RIG-I ( $\Delta$ CARDs) / polyI:C complex**

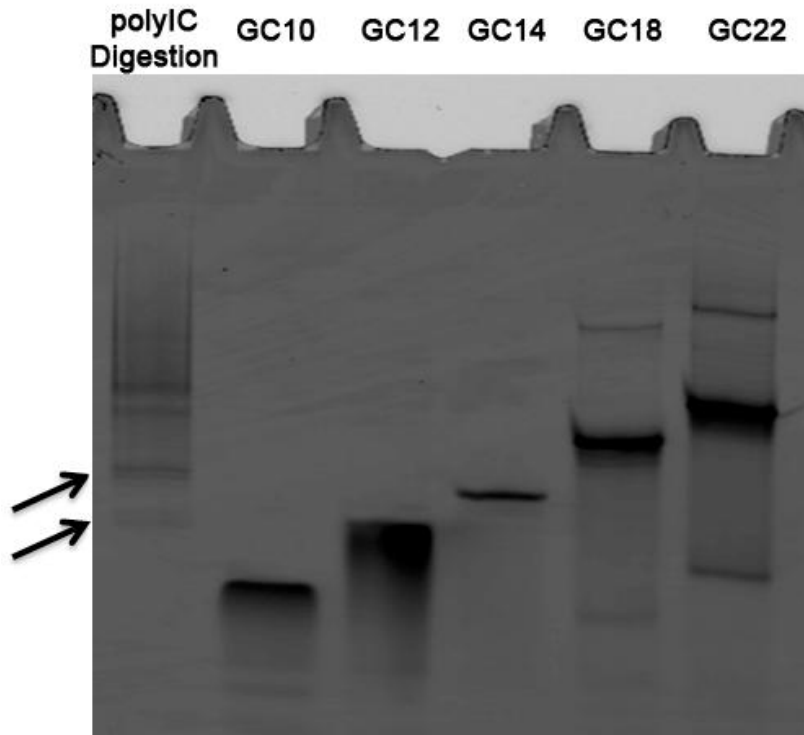

**Figure S7**, related to Figure 7  
**Analytical size exclusion chromatography of RIG-I ( $\Delta$ CARDs) : dsRNA oligo complexes**

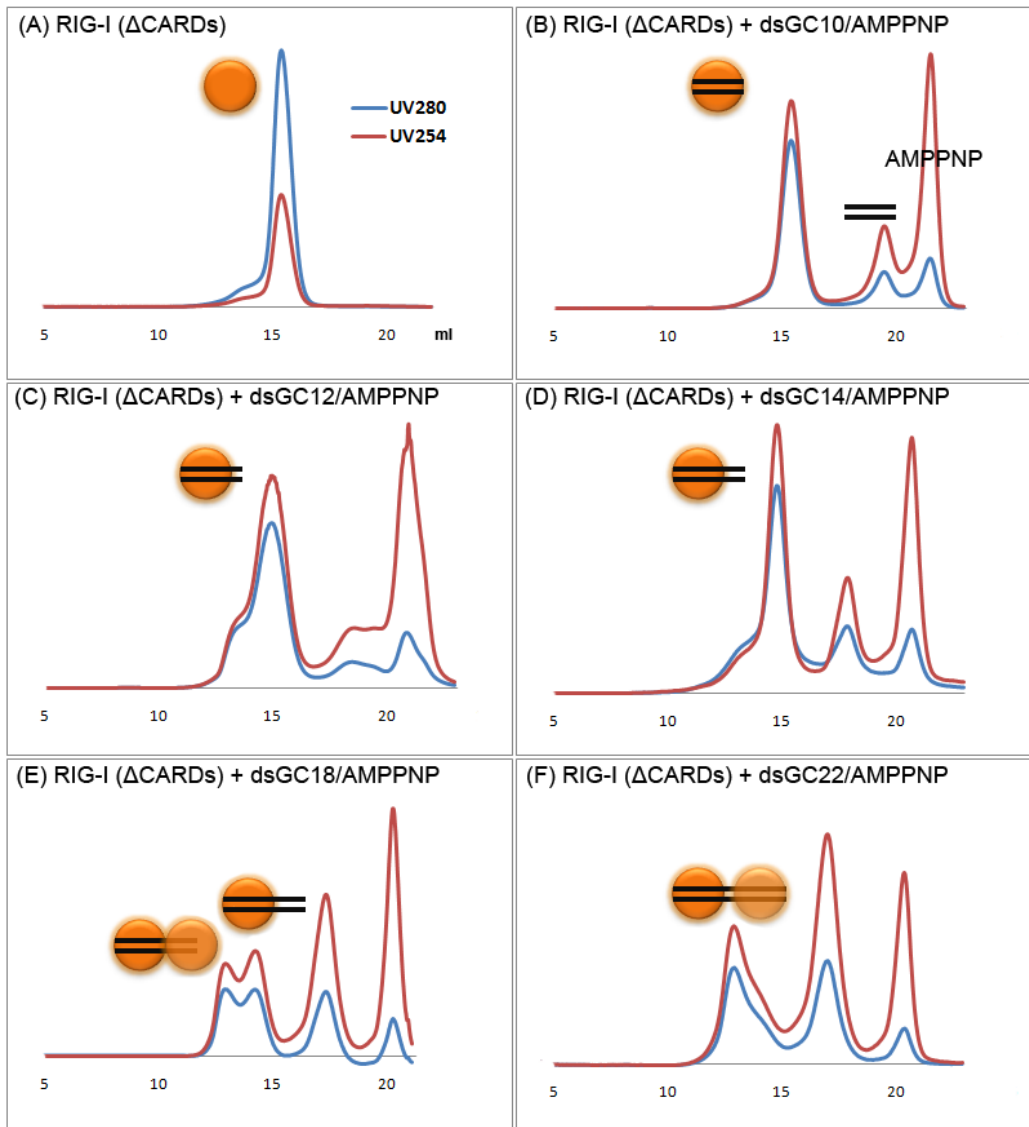

Supplement: NIHMS332796-supplement-02.pdf [file NIHMS332796-supplement-02.pdf]
