# Supplementary material
Source: PubMed Central journal article supplement (PMC3222294)
Supplement: NIHMS332796-supplement-01.pdf [file NIHMS332796-supplement-01.pdf]

**Table S1. Data Collection and Refinement Statistics, Related to Figure 1**

| <b>Data collection</b>                    |                                               |
|-------------------------------------------|-----------------------------------------------|
| Space group                               | P2 <sub>1</sub> 2 <sub>1</sub> 2 <sub>1</sub> |
| Cell dimensions                           |                                               |
| a, b, c (Å)                               | 47.6, 76.2, 219.8                             |
| Resolution (Å)                            | 47.6 - 2.5 (2.6 - 2.5) <sup>a</sup>           |
| R <sub>merge</sub> (%)                    | 7.5 (62.3)                                    |
| I / σ                                     | 14.5 (1.5)                                    |
| Completeness (%)                          | 93.8 (58.8)                                   |
| Redundancy                                | 5.0 (2.2)                                     |
| <b>Refinement</b>                         |                                               |
| Resolution (Å)                            | 45.0 - 2.5                                    |
| No. reflections                           | 25,452                                        |
| R <sub>work</sub> / R <sub>free</sub> (%) | 22.4 / 27.5                                   |
| No. atoms                                 | 5517                                          |
| Protein                                   | 4,985                                         |
| RNA / SO <sub>4</sub>                     | 424 / 5                                       |
| Water                                     | 103                                           |
| B-factors (Å <sup>2</sup> )               | 34.4                                          |
| Protein                                   | 35.0                                          |
| RNA / SO <sub>4</sub>                     | 27.8 / 60.0                                   |
| Water                                     | 28.5                                          |
| Ramachandran analysis                     |                                               |
| Favored                                   | 94.2                                          |
| Additionally allowed                      | 4.8                                           |
| Not favored                               | 1.0                                           |
| R.m.s. deviations                         |                                               |
| Bond lengths (Å)                          | 0.01                                          |
| Bond angles (°)                           | 1.3                                           |

<sup>a</sup> Highest resolution shell is shown in parenthesis.

**Table S2. Primers for Mutagenesis, Related to Figure 5**

|                                                                                                  |                             |
|--------------------------------------------------------------------------------------------------|-----------------------------|
| GGCCAATGGAGGCTGCCattCTTTTCTCAAGTTCCTGTTGGAGC                                                     | T55I                        |
| GCTCCAACAGGAACCTTGAGAAAAAGaatGGCAGCCTCCATTGGGCC                                                  |                             |
| CAGCCCATTAAACCAAGAAATTACgcaTTAGAGCTTGCTTTGCCTGC                                                  | Q247A                       |
| GCAGGCAAAGCAAGCTCTAAAtgcGTAATTTCTTGGTTAAATGGGCTG                                                 |                             |
| GGGAATTTGGAACACAGAAATATGAAgcaTGGATTGTTACAGTTCAGAAAGCATGCATGG                                     | Q511A                       |
| CCATGCATGCTTTCTGAACTGTAACAATCCAAtgcTTCATATTTCTGTGTTCCAAATTCCC                                    |                             |
| GGATTGTTACAGTTCAGAAAGCAgcaATGGTGTTCAGATGCCAGAC                                                   | C520A                       |
| GTCTGGCATCTGGAACACCATTggcTGCTTTCTGAACTGTAACAATCC                                                 |                             |
| TGATGAATGACTCTATTTTACGCCTTgcaACATGGGACGAAGCAGTATTTAGGG                                           | Q769A                       |
| CCCTAAATACTGCTTCGTCCCATGTggcAAGGCGTAAAATAGAGTCATTCATCA                                           |                             |
| CTATTTTACGCCTTCAGACATGGGACgcaGCAGTATTTAGGGAAAAGATTCTGC                                           | E773A                       |
| GCAGAATCTTTCCCTAAATACTGctgcGTCCCATGTCTGAAGGCGTAAAATAG                                            |                             |
| GCAGTATTTAGGGAAAAGATTCTGCATATAgcaACTCATGAAAAATTCATCAGAGATAGTCAAGAAAAACC                          | Q784A                       |
| GGTTTTCTTGACTATCTCTGATGAATTTTTCATGAGTggcTATATGCAGAATCTTTCCCTAAATACTGC                            |                             |
| CATGAAAAATTCATCAGAGATAGTCAAGAAAAACCAAAAAGATAAGGAAAATAAAAAACTGCTCTGCAGAA<br>AGTGCAAAGCC           | ΔPVP <sub>799-801</sub>     |
| GGCTTTGCACTTTCTGCAGAGCAGTTTTTTATTTTCCTTATCTTTGGTTTTTCTTGACTATCTCTGATGAATT<br>TTTCATG             |                             |
| CATGAAAAATTCATCAGAGATAGTCAAGAAAAACCAAAAagcagcagcaGATAAGGAAAATAAAAAACTGCTCT<br>GCAGAAAAGTGCAAAGCC | PVP <sub>799-801</sub> :AAA |
| GGCTTTGCACTTTCTGCAGAGCAGTTTTTTATTTTCCTTATCtgcctgcTTTTGGTTTTTCTTGACTATCTCTGAT<br>GAATTTTTCATG     |                             |
